# Supplementary material for: Assessing Risk of E. coli Resuspension from Intertidal Estuarine Sediments: Implications for Water Quality
Source: MDPI journal article supplement (doi:10.3390/ijerph16183255), 2019-09-05
Supplement: s1 [file s1]

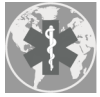

## Supplementary Materials: Assessing Risk of *E. coli* Resuspension from Intertidal Estuarine Sediments: Implications for Water Quality

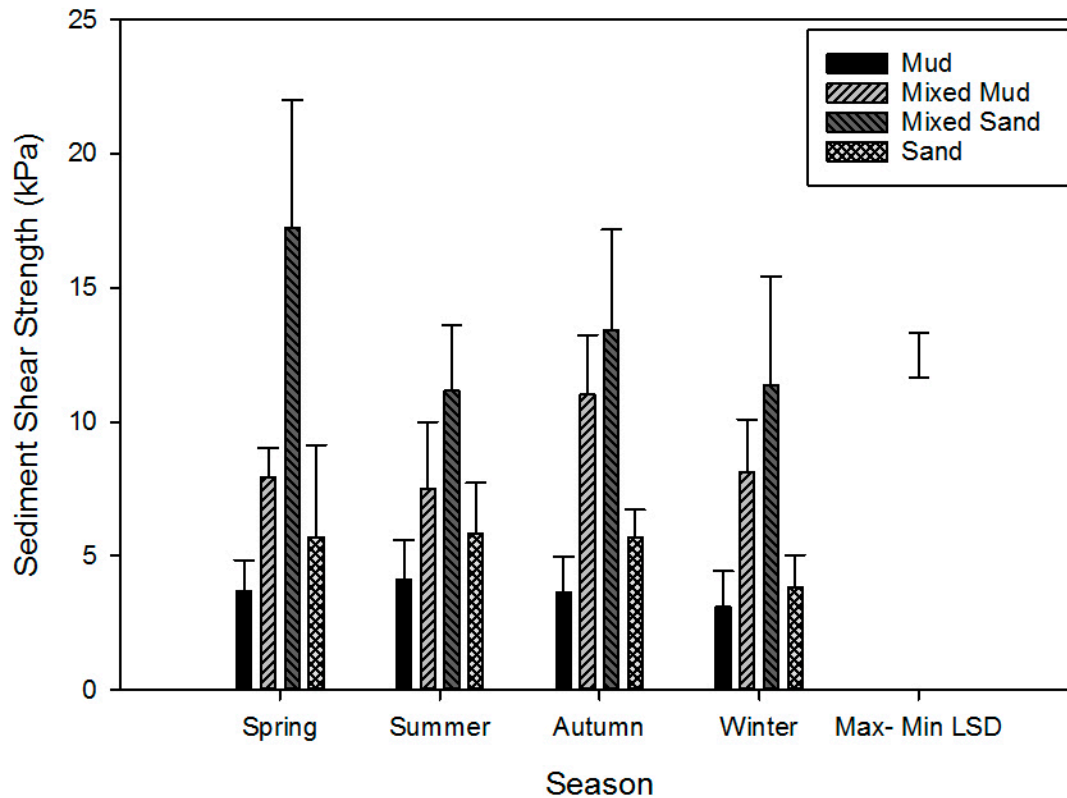

**Figure S1.** Means plot from the two-way ANOVA (site  $\times$  season) for sediment shear strength at four sediment types in the Ythan estuary. Error bars denote standard error from the mean. Solid fill bars: mud; light-grey dashed bars: mixed mud; dark-grey dashed bars: mixed sand; hatched bars: sand. Sediment stability measures are absent in mixed mud during summer, and sand during all seasons. Significant differences between treatment means are those larger than the max-min LSD value.

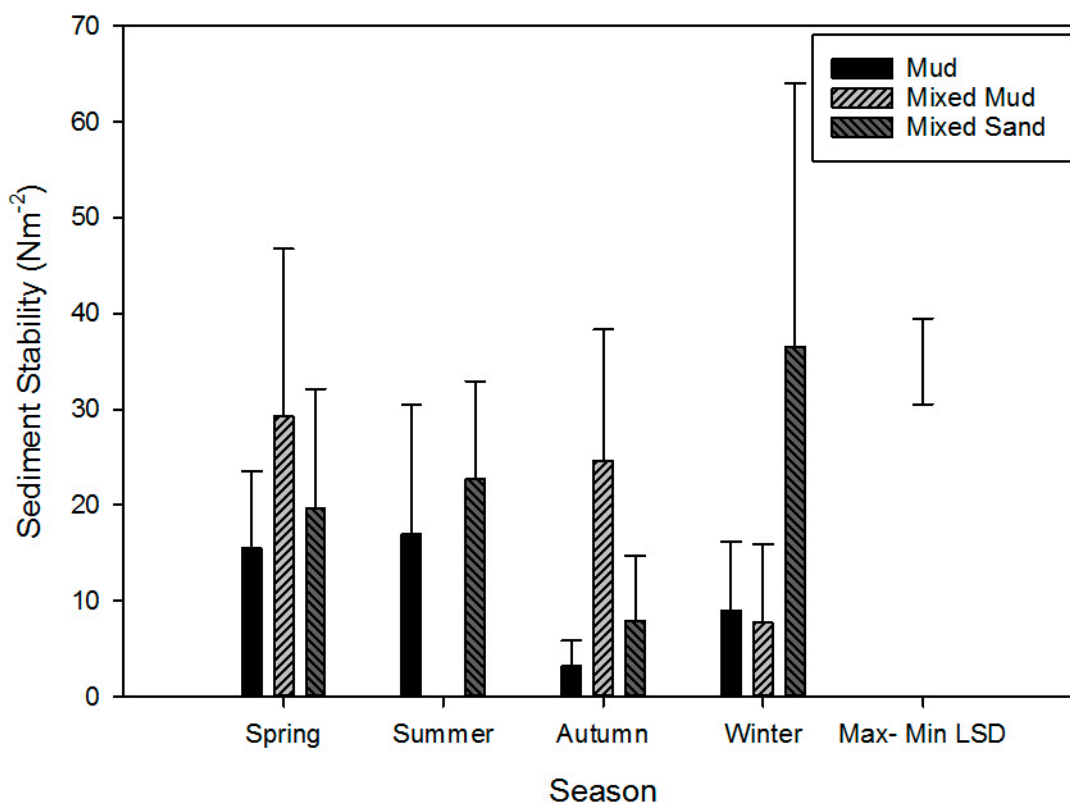

**Figure S2.** Means plot from the two-way ANOVA (site × season) for sediment surface stability at four sediment types in the Ythan estuary. Error bars denote standard error from the mean. Solid fill bars: mud; light-grey dashed bars: mixed mud; dark-grey dashed bars: mixed sand; hatched bars: sand. Sediment stability measures are absent in mixed mud during summer, and sand during all seasons. Significant differences between treatment means are those larger than the max-min LSD value.

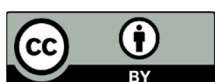

© 2019 by the authors. Submitted for possible open access publication under the terms and conditions of the Creative Commons Attribution (CC BY) license (<http://creativecommons.org/licenses/by/4.0/>).
